# Supplementary material for: Trends of Urolithiasis in China: A National Study Based on Hospitalized Patients from 2013 to 2018
Source: PubMed Central journal article supplement — Kidney Dis (Basel). 2022 Nov 7;9(1):49–57. doi: 10.1159/000527967 (PMC9900463; doi:10.1159/000527967), 2022-11-07
Supplement: kdd-0009-0049-s02.pdf [file kdd-0009-0049-s02.pdf]

(a) Gout/hyperuricemia

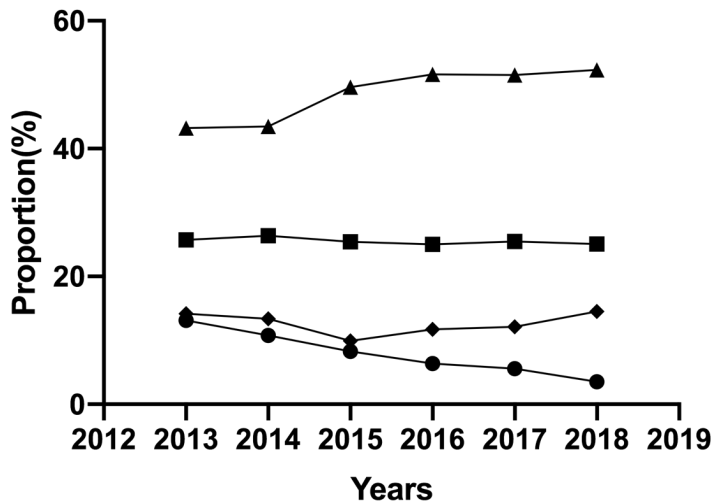

(b) Cardiovascular diseases

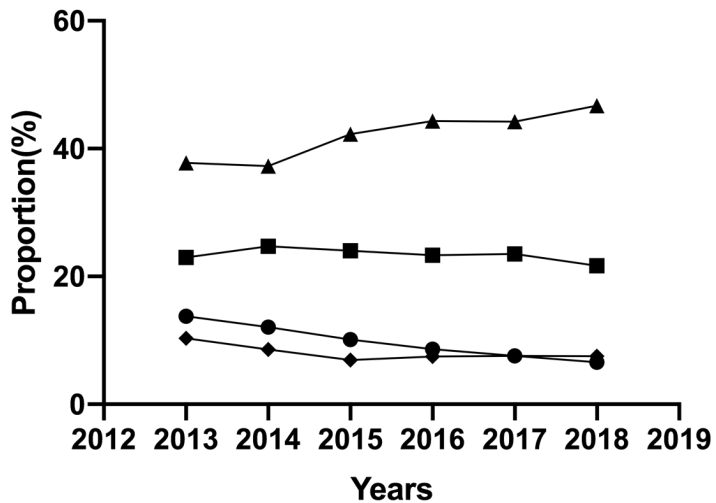

- Open surgery
- PCNL
- ▲ Ureteroscopy for stones
- ◆ ESWL

(c) Hypertension

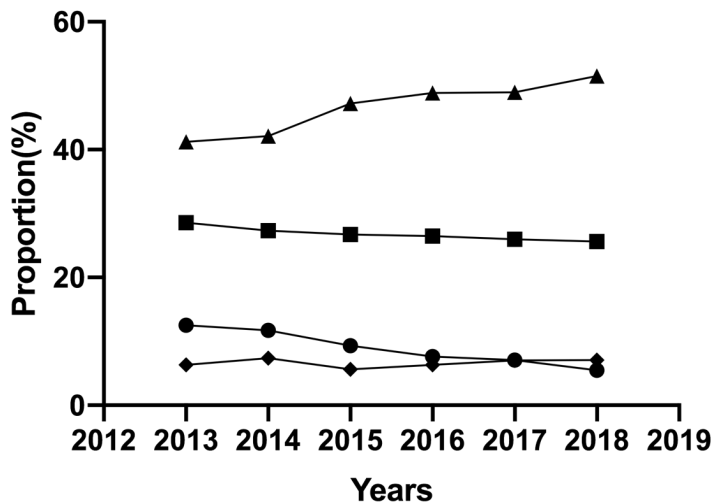

(d) Diabetes

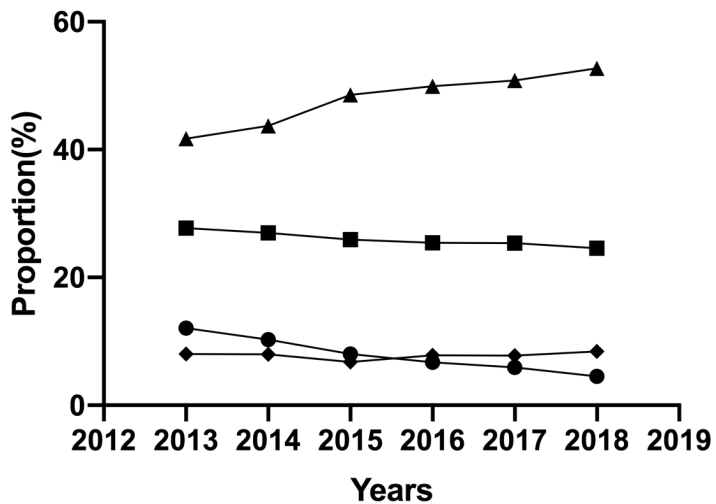

- Open surgery
- PCNL
- ▲ Ureteroscopy for stones
- ◆ ESWL
